# Supplementary material for: Association between tocilizumab treatment and clinical outcomes of COVID-19 patients: a systematic review and meta-analysis
Source: publisher site journal article supplement (doi:10.18632/aging.203834), 2022-01-17
Supplement: Supplementary file [file aging-v14i2-203834-supplementary-material-SD2.pdf]

## SUPPLEMENTARY TABLE

**Supplementary Table 1. Patient baseline characteristics of 8 RCTs in the meta-analysis.**

| Author                             | Olivier<br>Hermine | Carlo<br>Salvarani            | J.H. Stone          | Carlos<br>Salama    | I.O. Rosas      | Viviane C<br>Veiga  | Suresh<br>Kumar         | Arvinder<br>S Soin          | Anthony<br>C.<br>Gordon | Peter W<br>Horby |            |
|------------------------------------|--------------------|-------------------------------|---------------------|---------------------|-----------------|---------------------|-------------------------|-----------------------------|-------------------------|------------------|------------|
| Trial registration                 | NCT<br>04331808    | NCT<br>04346355               | NCT<br>04356937     | NCT<br>04372186     | NCT<br>04320615 | NCT<br>04403685     | CTRI/2020/0<br>5/024959 | CTRI/202<br>0/05/0253<br>69 | NCT<br>02735707         | NCT<br>04381936  |            |
| Treatment since<br>symptom onset d | Tocilizumab        | 10 (7-13)<br>(n=62)           | 7.0<br>(4.0-11.0)   | 9.0<br>(6.0-13.0)   |                 | 12.1±6.6<br>(n=291) | 10.0±3.1                |                             |                         | 9 (7-13)         |            |
|                                    | Control            | 10 (8-13)<br>(n=66)           | 8.0<br>(6.0-11.0)   | 10.0<br>(7.0-13.0)  |                 | 11.4±6.9<br>(n=143) | 9.5±3.0                 |                             |                         | 10 (7-14)        |            |
| Age                                | Tocilizumab        | 64.0<br>(57.1-74.3)           | 61.5<br>(51.5-73.5) | 61.6<br>(46.4-69.7) | 56.0±14.3       | 60.9±14.6           | 57.4±15.7               | 49.55±12.49                 | 56<br>(47-63)           | 61.5±12.5        | 63.3 ±13.7 |
|                                    | Control            | 63.3<br>(57.1-72.3)           | 60.0<br>(54.0-69.0) | 56.5<br>(44.7-67.8) | 55.6±14.9       | 60.6±13.7           | 57.5±13.5               | 48.30±14.62                 | 54<br>(43-63)           | 61.1±12.8        | 63.9 ±13.6 |
| Gender<br>(Male/Female)            | Tocilizumab        | 44/19                         | 40/20               | 96/65               | 150/99          | 205/89              | 44/21                   | 19/1                        | 76/15                   | 261/92           | 1335/687   |
|                                    | Control            | 44/23                         | 37/29               | 45/37               | 73/55           | 101/43              | 44/20                   | 7/3                         | 76/12                   | 283/119          | 1437/657   |
| Hypertension                       | Tocilizumab        |                               | 27                  | 80                  |                 | 178                 | 30                      |                             | 36                      |                  |            |
|                                    | Control            |                               | 29                  | 38                  |                 | 94                  | 34                      |                             | 34                      |                  |            |
| Diabetes                           | Tocilizumab        | 20(n=61)                      | 10                  | 45                  |                 | 105                 | 22                      |                             | 31                      |                  | 569        |
|                                    | Control            | 23(n=67)                      | 9                   | 30                  |                 | 62                  | 20                      |                             | 43                      |                  | 600        |
| Cardiac disease                    | Tocilizumab        | 20(n=61)                      |                     | 17                  |                 | 88                  | 4                       |                             | 15                      |                  | 435        |
|                                    | Control            | 20(n=67)                      |                     | 7                   |                 | 35                  | 3                       |                             | 12                      |                  | 497        |
| Pulmonary<br>disease               | Tocilizumab        | 3(n=61)                       | 2                   | 15                  |                 | 49                  | 2                       |                             | 1                       |                  | 473        |
|                                    | Control            | 3(n=67)                       | 2                   | 7                   |                 | 22                  | 2                       |                             | 2                       |                  | 484        |
| Chronic kidney<br>disease          | Tocilizumab        | 5(n=61)                       |                     | 29                  |                 |                     | 5                       |                             | 4                       |                  | 118        |
|                                    | Control            | 13(n=67)                      |                     | 13                  |                 |                     | 1                       |                             | 4                       |                  | 99         |
| Cancer                             | Tocilizumab        | 4(n=61)                       |                     | 22                  |                 |                     | 5                       |                             |                         |                  |            |
|                                    | Control            | 5(n=67)                       |                     | 8                   |                 |                     | 5                       |                             |                         |                  |            |
| Asthma                             | Tocilizumab        | 5(n=61)                       |                     | 15                  |                 |                     | 4                       |                             |                         |                  |            |
|                                    | Control            | 3(n=67)                       |                     | 7                   |                 |                     | 1                       |                             |                         |                  |            |
| Liver disease                      | Tocilizumab        |                               |                     |                     |                 | 6                   |                         |                             |                         |                  | 14         |
|                                    | Control            |                               |                     |                     |                 | 2                   |                         |                             |                         |                  | 10         |
| Body mass<br>index(BMI)            | Tocilizumab        | 27.9<br>(23.3-30.8)<br>(n=46) |                     | 29.9<br>(26.0-34.2) | 32.0±7.9        |                     |                         |                             |                         |                  |            |
|                                    | Control            | 27.4<br>(24.5-31.3)<br>(n=46) |                     | 30.2<br>(25.7-33.8) | 33.1±7.2        |                     |                         |                             |                         |                  |            |
| Obesity<br>(BMI≥ 30)               | Tocilizumab        |                               | 16                  | 80                  |                 | 63                  | 15                      |                             |                         |                  |            |
|                                    | Control            |                               | 22                  | 42                  |                 | 27                  | 16                      |                             |                         |                  |            |
